# Supplementary material for: ArgR of Streptomyces coelicolor Is a Pleiotropic Transcriptional Regulator: Effect on the Transcriptome, Antibiotic Production, and Differentiation in Liquid Cultures
Source: Front Microbiol. 2018 Mar 1;9:361. doi: 10.3389/fmicb.2018.00361 (PMC5839063; doi:10.3389/fmicb.2018.00361)
Supplement: Supplementary file 4 [file Table4.XLSX]

## Sheet: Tabla S_
	Table S4A. Predicted ARG boxes found in S. coelicolor chromosome1
1) FIMO program, fed with the ARGNE06 model, was used through the MEME server (see Materials and Methods). The relative location of the possible ARG box is indicated with i or c (intergenic or in coding sequence). Symbols '>' and '<' indicate the gene orientation. Distances of the matched sequence to next gene start or end are indicated. Significant-differentially expressed genes are marked in ye…
							Intercepted Gene (if any)
							Left					Right
Ri	p-value	Matched Sequence	Intergenic / Coding sequence	Product	Gene	Transcription orientation	Distance (nt)	Distance	Transcription orientation	Gene	Product	Distance	Distance	Transcription orientation	Gene	Product
16.3254	6.53e-10	TCATGCATGAGTATGCAGAA	i	argH argininosuccinate lyase	SCO1570	<	30						71	>	SCO1571	hypothetical protein
17.2376	1.24e-09	CTTTGCATGGTCATGCGTAA	i	gabD succinate-semialdehyde dehydrogenase, fragment	SCO7035	>	21						18	>	SCO7036	argG; argininosuccinate synthase
15.8588	3.86e-08	GTCTGCGTGATCATTCAGTG	i	putative secreted transglycosylase	SCO4132	>	67						120	>	SCO4133	putative integral membrane protein
15.6744	4.8e-08	GAACGCATACCTATGCAGTG	i	transglutaminase-like protein	SCO1086	<	25						16	<	SCO1087	putative aldolase
13.3077	1.37e-07	CGATGCACGTTTATGCAATG	c	argC N-acetyl-gamma-glutamyl-phosphate reductase	SCO1580	<	38	4	>>	SCO1581	hypothetical protein SCI35.03	540	530	<	SCO1582	ATP/GTP binding protein
12.6331	2.55e-07	CAATGCATGATCATGCCACA	i	LuxR-family transcriptional regulator	SCO2686	<	23						267	>	SCO2687	ribA1; GTP cyclohydrolase II
15.2953	2.79e-07	GGCTGCGTAATCATGCGGAA	i	putative hydrolase	SCO6324	>	126						728	<	SCO6325	hypothetical protein; putative membrane protein
11.1718	2.82e-07	GATTCCAAGATCATTCAAGC	i	hypothetical protein	SCO3395	<	237						-5	<	SCO3396	putative membrane protein
13.5919	3.79e-07	GCATCCATGATCTTGCGGAA	c	LSR2-like protein	SCO4076	<	523	172	>>	SCO4077	purS hypothetical protein SCD25.13	81	78	>	SCO4078	purQ; phosphoribosyl formylglycinamidine synthase I
10.7022	4.46e-07	TCATGCGTAATGATGCATAC	i	gabD succinate-semialdehyde dehydrogenase,fragment	SCO7035	>	31						8	>	SCO7036	argG; argininosuccinate synthase
10.6573	4.71e-07	TGCTGCAAAAATGTGCAAGA	i	malE putative maltose-binding protein	SCO2231	<	136						237	>	SCO2232	malR; maltose operon transcriptional repressor
14.2476	7.4e-07	GTGTGCATGTCCGTGCAGAA	c	putative transmembrane efflux protein	SCO7128	<	417	301	<<	SCO7129	conserved hypothetical protein	150	453	>	SCO7130	hypothetical protein
10.0588	7.95e-07	ATACGGATGATCTTTCAGTG	i	putative lipoprotein	SCO6377	<	31						507	<	SCO6378	hypothetical protein
16.7264	9.08e-07	GACCGCAAGCTCATGCAGCG	c	hypothetical protein	SCO6634	>	3024	2727	>>	SCO6635	pglY bacteriophage (phiC31) resistance gene pglY	1138	1135	>	SCO6636	pglZ; bacteriophage (phiC31) resistance gene pglZ
12.425	1.04e-06	TTCTGCATCATCATGCCGAC	c	hypothetical protein	SCO4030	<	1491	1381	<<	SCO4031	putative integral membrane transport protein	1179	1193	<	SCO4032	putative marR regulatory protein
15.0818	1.13e-06	GCCTGCATGATCTTGGGGAG	c	hypothetical protein	SCO0928	<	646	649	<<	SCO0929	hypothetical protein	144	370	<	SCO0930	putative lipoprotein
12.3475	1.16e-06	TCGCGCAAAATCATGCAAGC	i	afsL putative eukaryotic-type protein kinase	SCO4377	>	53						61	>	SCO4378	conserved hypothetical protein
10.7757	1.41e-06	TTCTGCATGGCTTTCCTTTC	i	putative secreted oxidoreductase	SCO7791a	<	-7						278	<	SCO7792	hypothetical protein
11.7254	1.93e-06	TTCGGCATGCTCATCCAGTA	c	putative lysyl-tRNA synthetase	SCO3303	<	684	510	>>	SCO3304	argS putative arginyl-tRNA synthetase	1231	1367	>	SCO3305	putative membrane protein
11.6201	2.16e-06	TTCTGGGAGATCGTGCAGAA	c	putative integral membrane protein	SCO3562	>	1288	1026	>>	SCO3563	acsA acetyl-coenzyme A synthetase	910	1094	>	SCO3564	putative sodium/proton antiporter
14.3147	2.2e-06	GGACGCAAGATCACGCAGAG	i	putative hydrolase	SCO4634	<	34						456	>	SCO4635	rpmG; 50S ribosomal protein L33
15.6779	2.2e-06	GCCCGCGTGATCATGCAGGA	c	,putative UDP-N-acetylglucosamine transferase MurA2	SCO5998	<	824	234	>>	SCO5999	sacA aconitase	2461	2678	>	SCO6000	hypothetical protein
14.1998	2.42e-06	GTCCGCAAGTTCGTGCAGGA	i	putative transcriptional regulator	SCO5692	<	250						24	>	SCO5693	putative acyl CoA dehydrogenase
10.0518	2.49e-06	TTCTGCATCTTCATGGGTTC	c	putative peptide hydrolase	SCO3610	<	199	75	>>	SCO3611	hypothetical protein	742	838	<	SCO3612	putative membrane protein
13.8733	3.14e-06	CCCTGCGTAACCATCCAGTC	c	putative dehydrogenase	SCO6587	>	1434	1306	<<	SCO6588	undefined_product	6	618	>	SCO6589	fusB; elongation factor G
13.8555	3.2e-06	GCCTGCTTGGTCATGCGTTC	c	hypothetical protein	SCO6817	<	190	193	<<	SCO6818	putative phosphoglycerate mutase.	1323	1320	<	SCO6819	aroA; 3-phosphoshikimate 1-carboxyvinyltransferase.
12.4511	3.26e-06	CCCTCGAAGACCATGCAGTA	c	putative efflux membrane protein	SCO2498	>	2018	1978	<<	SCO2499	putative transport ATPase	2421	2447	>	SCO2500	putative membrane protein
12.4022	3.42e-06	GTGTGCATGGCTTTGCTGAC	c	putative integral membrane protein	SCO3499	<	354	343	<<	SCO3500	hypothetical protein	1680	1687	<	SCO3501	hypothetical protein
10.992	3.51e-06	GTCTGCATCTTCATGCTGCA	c	putative cell surface biosynthesis associated protein	SCO3672	<	739	495	>>	SCO3673	putative iron-sulphur-binding reductase	1768	1903	>	SCO3674	putative secreted kinase
12.3185	3.64e-06	TCCTCCATGATCACGCGGTA	c	putative long-chain fatty-acid CoA ligase.	SCO2561	<	927	685	<<	SCO2562	lepA GTP-binding protein.	1164	1402	>	SCO2563	rspT; 30s ribosomal protein S20.
12.28	3.81e-06	TGCTGCATGACCGTTCACGA	i	putative secreted protein	SCO2604	<	158						-13	>	SCO2605	hypothetical protein
12.122	4.29e-06	TACCGCGTGGTCATACGTTC	i	hypothetical protein	SCO5606	<	-13						45	>	SCO5607	putative transcriptional regulator
12.0715	4.37e-06	TCACGCATGATGTTGCGGTG	c	hypothetical protein	SCO4581	>	244	220	<<	SCO4582	hypothetical protein	252	1107	>	SCO4583	putative transferase
12.0659	4.37e-06	CTGTGCATGGTGATCCAGTC	i	putative DNA-binding protein	SCO7767	<	85						26	>	SCO7768	conserved hypothetical protein
13.4029	4.49e-06	GTCTGCAAGACTTTCCGGGG	c	hypothetical protein	SCO2870	>	502	498	>>	SCO2871	hypothetical protein	463	460	>	SCO2872	hypothetical protein
14.616	5.14e-06	GACCGCATGGGCATGCGCTA	c	putative integral membrane protein	SCO5010	>	188	168	>>	SCO5011	putative integral membrane protein	715	978	>	SCO5012	putative integral membrane protein
13.1855	5.23e-06	GTCCCCATCGTCATGCAGTG	c	hypothetical protein	SCO1175	<	1844	1183	<<	SCO1176	putative dihydroxy-acid dehydratase	588	697	>	SCO1177	putative gntR-famly transcriptional regulator
14.5389	5.37e-06	GCCTCCATGGCTGTGCAGAC	i	hypothetical protein	SCO4292	<	312						-7	>	SCO4293	putative threonine synthase
10.4137	5.47e-06	TTGTGCATGAAGTTGCAGCC	c	aroA 3-phosphoshikimate 1-carboxyvinyltransferase.	SCO6819	<	1343	1288	<<	SCO6820	putative oxidoreductase.	1023	1326	<	SCO6821	putative transferase.
13.1508	5.56e-06	TGCTGCATGAACGCGCAGTC	i	hypothetical protein	SCO4402	>	42						-13	>	SCO4403	putative formyltetrahydrofolate deformylase (fragment)
13.0896	5.62e-06	CCCTGCATATCCATGCCGAC	c	putative secreted sugar-binding protein	SCO3484	<	696	514	<<	SCO3485	putative lacI-famlily transcriptional regulator	516	678	>	SCO3486	putative aldehyde dehydrogenase
13.1432	5.62e-06	GAATGCATGCCCACCCAGTC	i	putative small hydrophilic protein	SCO4218	>	222						-13	>	SCO4219	putative dienelactone hydrolase family
14.4762	5.66e-06	CATCGCATGACCATGCGCCG	i	hypothetical protein	SCO3935	>	14						264	>	SCO3936	putative plasmid replication initiator protein
13.0308	5.92e-06	CACCGCAACATCATGCGGGA	c	putative S-adenosylmethionine:tRNA ribosyltransferase-isomerase	SCO1804	>	849	495	>>	SCO1805	putative secreted protein	220	347	<	SCO1806	conserved hypothetical protein
10.333	5.97e-06	ACATGCATGGATACGCAGTC	c	putative transposase	SCO0053	>	685	688	<<	SCO0055	putative membrane-associated oxidoreductase	804	890	>	SCO0056	hypothetical protein
13.039	5.97e-06	GCCTGCACGACCATGGAACA	i	purK phosphoribosylaminoimidazole carboxylase ATPase subunit PurK	SCO3060	<	73						-7	>	SCO3061	putative integral membrane protein
10.2806	6.13e-06	GTACGGATGATCACACGGTA	i	putative esterase	SCO7057	<	35						64	<	SCO7058	putative integral membrane protein
13.0072	6.19e-06	TTCTGCACGATCGTGCTGGG	c	putative two-component sensor kinase	SCO5435	<	353	198	>>	SCO5436	putative sodium:dicarboxylate symporter	1183	1347	>	SCO5437	putative MerR-family transcriptional regulator
11.6101	6.24e-06	ACCTGCATGATCTTGCTGCC	c	putative ABC transporter ATP-binding subunit	SCO5393	<	270	121	<<	SCO5394	putative ABC transporter integral membrane subunit	636	633	<	SCO5395	putative ABC transporter ATP-binding subunit
11.4774	6.69e-06	GTCGGCATGCTGATGCAGAA	c	putative tetR-family transcriptional regulator	SCO0622	>	1202	1149	>>	SCO0623	putative membrane transport protein	451	534	<	SCO0624	putative secreted protein
11.4572	6.93e-06	GACTCCAAGATCATCCGTCC	c	putative citrate synthase	SCO5831	<	1223	1098	>>	SCO5832	putative citrate synthase	55	196	<	SCO5833	undefined_product
12.8151	7.18e-06	GCATGCGTGAACGTGCAGTG	c	putative hydroxylase	SCO7283	>	42	10	>>	SCO7284	rnhA putative ribonuclease H	678	781	>	SCO7285	putative hydroxylase
10.0121	7.43e-06	CTCCGCATCGATATACGGTA	i	putative exodeoxyribonuclease	SCO3174	<	22						7	>	SCO3175	putative acetyltransferase.
11.3631	7.69e-06	CCACGCATGACCACTCAACA	i	pyk pyruvate kinase	SCO2014	<	39						159	>	SCO2015	2',3'-cyclic-nucleotide 2'-phosphodiesterase, putative
12.6309	8.11e-06	CCCTGCGTGATTTTGCGAGG	i	hypothetical protein	SCO4212	>	384						21	>	SCO4213	hypothetical protein
11.1896	8.61e-06	CCCTGTGTGTTCATGCGATC	i	hypothetical protein	SCO1178	<	-13						28	<	SCO1179	hypothetical protein
12.488	8.98e-06	TCCACCATGACCATGCAGCC	i	MutT MutT domain containing protein	SCO0278	>	74						-13	>	SCO0279	putative glycosyl hydrolase
11.0793	9.22e-06	GACTCCAAGACCTTCCAGGA	c	ftsK homolog	SCO5750	>	1009	705	>>	SCO5751	hypothetical protein	139	231	>	SCO5752	hypothetical protein
13.7666	9.62e-06	CTACGCACGGTCATACGGCC	c	putative lysR-family transcriptional regulator	SCO6309	>	572	110	>>	SCO6310	putative cytochrome P450	1214	1395	>	SCO6311	putative integral membrane protein
11.0431	9.62e-06	CATCGTACGGTCGTTCAGAC	c	hypothetical protein	SCO6991	>	1396	681	<<	SCO6992	absR1 regulatory protein	379	458	>	SCO6993	absR2; regulatory protein.
12.3055	9.95e-06	GACTGGAAGACCATGCCGAC	c	gluB glutamate periplasmic binding protein	SCO5776	<	601	475	<<	SCO5777	gluA glutamate uptake system ATP-binding protein	282	585	>	SCO5778	; two-component system regulator
15.067	1e-05	CTCCGCACGACCATCCGGTC	c	hypothetical protein	SCO2694	>	365	244	>>	SCO2695	hypothetical protein	507	564	>	SCO2696	; putative 2-hydroxyacid dehydrogenase
10.9727	1.02e-05	GGAAGCATGACCGTGCACAA	i	putative aldehyde dehydrogenase	SCO3486	>	377						-13	>	SCO3487	; putative secreted hydrolase
10.9668	1.02e-05	TGCTGCTTGGTCATGCGGTT	c	hypothetical protein	SCO4154	>	1239	1264	<<	SCO4155	putative two-component system sensor	162	159	<	SCO4156	; putative two-component systen response regulator
10.9327	1.05e-05	GATCGAACAGGCATGCGATC	i	undefined_product	SCO5821	>	628						135	>	SCO5822	gyrB2; putative DNA gyrase subunit B
12.2337	1.08e-05	CAGCGCAAGCTCATCCAGTC	c	hypothetical nuclease	SCO4576	<	1307	1074	>>	SCO4577	putative helicase	937	976	<	SCO4578	hypothetical protein
10.8352	1.11e-05	GGACGAATGACCTTGGAGCA	c	putative sigma factor	SCO6239	<	340	257	<<	SCO6240	hypothetical protein	458	692	>	SCO6241	hypothetical protein
10.7852	1.13e-05	GTCACCATGATCATGGAGGG	c	putative integral membrane protein	SCO1797	<	242	187	<<	SCO1798	putative ABC transporter ATP-binding subunit	591	745	>	SCO1799	hypothetical protein
12.154	1.15e-05	TCCTGGATGAGCTTCCAGGC	c	putative DNA-binding protein.	SCO0891	>	525	505	<<	SCO0892	putative integral membrane protein.	426	575	>	SCO0893	; putative membrane protein
12.154	1.15e-05	TCCTGGATGAGCTTCCAGGC	c	ionic transporter	SCO1962	<	689	556	<<	SCO1963	putative integral membrane export protein	426	679	<	SCO1964	; putative export associated protein
12.1213	1.17e-05	CGCTGGATGATCACACGGAC	c	hypothetical HIT family protein	SCO1530	<	2038	1948	<<	SCO1531	thrS threonine-tRNA synthetase	9	198	<	SCO1532	hypothetical protein
12.1454	1.17e-05	TTCCGCATGAGCACGCAGGT	c	accA1 acyl-CoA carboxylase alfa subunit	SCO6271	<	1293	984	>>	SCO6272	scF putative secreted FAD-binding protein	649	725	<	SCO6273	cpkC; type I polyketide synthase
10.7371	1.18e-05	GTCCGTATCAGTATGCGGGA	i	leuA 2-ispoprylmalate synthase,2-isopropylmalate synthase (fragment).	SCO2528	<	200						144	>	SCO2529	; putative metalloprotease.
12.0963	1.19e-05	CTCCCCAAGGTCATCCAGGA	c	putative protease	SCO5149	>	222	75	>>	SCO5150	hypothetical protein	391	548	>	SCO5151	hypothetical protein
13.4859	1.2e-05	TGCTGCATGCGCGTGCACAG	c	hypothetical protein	SCO0699	<	1506	1423	<<	SCO0700	abaA-orfE probable ABC transporter protein, ATP-binding component.	327	486	<	SCO0701	abaA-orfD; hypothetical protein SCF42.11c.
10.7424	1.2e-05	TCATGGAAGACCTCGCAGAC	i	putative cytochrome P450	SCO0774	<	-3						294	>	SCO0775	; conserved hypothetical protein
11.9561	1.33e-05	CAGCGCATGATCGCGCAGTA	c	putative multi-domain protein multifunctional secreted protein	SCO0505	>	582	444	>>	SCO0506	nadE NH(3)-dependent NAD(+)synthetase (EC 6.3.5.1)	367	387	<	SCO0507	hypothetical protein
11.9502	1.33e-05	CCCCGCATGGACATGCACAT	c	possible secreted protein	SCO3402	>	119	103	<<	SCO3403	folE putative GTP cyclohydrolase I	483	615	<	SCO3404	ftsH2; cell division protein ftsH homolog
11.8414	1.43e-05	CTGCGCAAGGTCATGGAGGA	c	putative integral membrane protein.	SCO1418	>	726	729	>>	SCO1419	putative phosphodiesterase.	19	71	>	SCO1420	; putative integral membrane protein.
13.2135	1.43e-05	GACCGGAAGAGCGTGCAGTC	c	hypothetical protein	SCO3193	>	677	516	>>	SCO3194	putative lipoprotein	688	926	>	SCO3195	hypothetical protein
11.8255	1.44e-05	CTCTCCGTGATCATGCACCC	i	cutS two-component sensor (kinase)	SCO5863	>	120						267	>	SCO5864	hypothetical protein
10.4685	1.45e-05	CGATGCATCGTCGTTCATCC	i	aspS aspartyl-tRNA synthetase	SCO3795	<	-7						195	>	SCO3796	hypothetical protein
11.8041	1.47e-05	TTCTGCATGTGGGTGCGGAC	c	putative MarR-family regulator	SCO3133	>	92	133	<<	SCO3134	putative two-component response regulator	804	867	>	SCO3135	putative acetyltransferase
13.1634	1.5e-05	TTCTGCGTGAGCACGCGGAC	c	hypothetical protein	SCO6463	>	480	448	<<	SCO6464	putative SIR2 family transcriptional regulator,putative SIR2 family transcriptional regulator	258	300	<	SCO6465	hypothetical protein
10.3734	1.55e-05	ATCCGTACGACCATTCAGCG	i	putative glutathione S-transferase	SCO0777	>	7						23	>	SCO0778	putative integral membrane protein
11.7136	1.55e-05	TCCCGCAAGACGATCCAGAC	c	putative secreted nucleosidase	SCO5431	<	385	357	>>	SCO5432	putative integral membrane protein	163	371	>	SCO5433	tcrA AfsR-like regulator with TPR domain
10.3594	1.59e-05	TTCAGCACGTCCTTGCGGTA	c	putative sugar transporter inner membrane protein	SCO2433	<	847	850	<<	SCO2434	putative sugar transporter sugar binding protein	489	758	>	SCO2435	hypothetical protein
11.7062	1.59e-05	GTCTGGATGGACAAGCAGCC	c	redN transferase	SCO5890	>	291	177	>>	SCO5891	redM peptide synthase	1402	1403	>	SCO5892	redL polyketide synthase
13.0284	1.61e-05	GGCCGCACACTCATGGAGAC	i	putative integral membrane protein	SCO0246	<	362						194	>	SCO0247	hypothetical protein
11.6835	1.61e-05	GGATGGATGACTGTGCGACG	i	hypothetical protein	SCO4582	<	159						677	>	SCO4583	putative transferase
13.0199	1.65e-05	CTGCGCACGGTCATGCGTGA	c	conserved hypothetical protein SCJ1.19c	SCO0170	<	1329	1119	>>	SCO0171	pncB PncB, Nicotinic acid phosphoribosyltransferase	178	286	>	SCO0172	hypothetical protein
11.64	1.65e-05	GTCAGTATGACCACGCGGAC	c	putative integral membrane efflux protein	SCO2164	<	610	430	<<	SCO2165	putative two component response regulator	234	231	<	SCO2166	putative two component sensor kinase
10.2397	1.68e-05	GACACCATGATCGTGCGATC	c	actII-2 putative actinorhodin transporter	SCO5083	>	1965	1965	>>	SCO5084	actII-3 putative membrane protein	151	301	>	SCO5085	actII-4 actinorhodin cluster activator protein
11.6143	1.69e-05	TACTCGATGGGCATGCGGCA	c	putative secreted serine protease	SCO1741	<	684	414	>>	SCO1742	putative ABC-transporter ATP-binding protein	487	484	>	SCO1743	putative ABC-transporter transmembrane protein
11.5589	1.73e-05	TACCGCAAGGTCATGGACGC	c	tkt3 probable transketolase	SCO1935	>	548	513	>>	SCO1936	tal2 putative transaldolase	586	590	>	SCO1937	zwf2 putative glucose-6-phosphate 1-dehydrogenase
12.9189	1.75e-05	TCCCGGACGATCTTGCGGAG	c	transposase	SCO0368	>	1102	1105	<<	SCO0369	putative secreted protein	2133	2164	<	SCO0370	possible DNA-binding protein
11.5528	1.75e-05	TACCGCAAGCTGATGCGGGA	c	hypothetical protein	SCO6148	>	1208	960	>>	SCO6149	putative integral membrane nucleotide binding protein	121	194	>	SCO6150	putative ADA-like regulatory protein
12.9036	1.76e-05	CCCCCCATGACCGTTCAGAC	c	putative large ATP-binding protein	SCO3370	>	128	57	>>	SCO3371	hypothetical protein	643	687	>	SCO3372	putative large ATP-binding protein
14.2369	1.78e-05	CACTGCACGGCCATGCCGAC	c	ruvB holliday junction DNA helicase	SCO1518	<	564	517	<<	SCO1519	ruvA holliday junction DNA helicase	69	66	<	SCO1520	ruvC crossover junction endodeoxyribonuclease
10.1538	1.82e-05	CACCGCATATTCACTCGTCG	c	putative fumarylacetoacetase	SCO4580	<	493	8	>>	SCO4581	conserved hypothetical protein	782	806	<	SCO4582	hypothetical protein
14.2226	1.84e-05	CGCCGGAAGGCCATGCGGAA	c	putative integral membrane protein	SCO0778	>	259	238	<<	SCO0779	conserved hypothetical protein	138	330	>	SCO0780	putative zinc-binding oxidoreductase
11.4774	1.85e-05	CTCTGGGTGGTCATGGAGGA	c	putative regulatory protein	SCO7614	<	618	519	>>	SCO7615	putative DNA-binding protein	334	331	>	SCO7616	putative AbaA-like protein
10.1082	1.87e-05	CCCAGAATGTCCATACGGAC	i	hypothetical protein	SCO6493	<	-13						9	>	SCO6494	putative membrane protein
10.1039	1.88e-05	GCCAGAATGTCCTTGCGGTA	c	putative binding protein dependent transport	SCO3504	<	795	790	<<	SCO3505	putative secreted substrate binding protein	480	641	>	SCO3506	putative lacI-family transcriptional regulator
11.4423	1.9e-05	ATGCGCAAGAGCATGCAGGG	c	rplV 50S ribosomal protein L22	SCO4707	>	396	396	>>	SCO4708	rpsC 30S ribosomal protein S3	418	424	>	SCO4709	rplP; 50S ribosomal protein L16
10.0706	1.91e-05	TTCCGCACCAGCATTCGGTA	i	putative integral membrane protein	SCO1752	>	48						185	>	SCO1753	putative integral membrane protein
11.3916	1.93e-05	GAGCGCATGATCATCGAGGC	c	hypothetical protein	SCO3711	>	614	519	>>	SCO3712	putative	298	312	<	SCO3713	hypothetical protein
15.4765	1.99e-05	CCCTGCATGCGCTTGCGGCG	c	fpgS folylpolyglutamate synthase	SCO2614	<	2846	2371	<<	SCO2615	valS valyl tRNA synthetase	234	372	>	SCO2616	hypothetical protein,putative membrane protein
10.017	1.99e-05	CACCGCGAGTTCATTCGAAG	i	hypothetical protein	SCO5581	<	200						228	>	SCO5582	nsdA Negative regulator of antibiotic production and morphological differentiation
13.9845	2.14e-05	GTCTCCATGCCCTTGCGGCC	c	putative DNA-binding protein	SCO6003	<	1510	1327	<<	SCO6004	hypothetical ATP/GTP binding protein,conserved hypothetical protein (fragment)	2460	3022	>	SCO6005	hypothetical protein
11.2466	2.16e-05	GAATGCGACACCATGCAGGC	c	transmembrane efflux protein	SCO5810	<	539	351	>>	SCO5811	transcriptional regulator	250	332	>	SCO5812	Undefined product
11.255	2.16e-05	GCCCGAGTGGTCATGGAGAA	c	undefined_product	SCO5821	>	2069	1287	>>	SCO5822	gyrB2 putative DNA gyrase subunit B	817	1036	>	SCO5823	Undefined product
12.5557	2.26e-05	CCGAGCATGACCGTGCAGAC	i	putative sugar transporter sugar binding protein	SCO5232	>	83						-13	>	SCO5233	putative sugar transporter integral membrane protein
11.1466	2.28e-05	TGCCGCATGATGTTCCAGGC	c	putative two-component response regulator	SCO1654	>	1518	1399	<<	SCO1655	putative lipoprotein oligopeptide binding protein	186	630	<	SCO1656	putative hydrolase
12.5404	2.28e-05	TGGCGCATGCTCATCCAGGC	c	acsR transcriptional activator of macs1-fadD1 operon	SCO6194	<	1016	891	>>	SCO6195	macs1 acyl-CoA synthase	766	763	>	SCO6196	fadD1 acyl-CoA synthase
11.1763	2.3e-05	TTCCGGATGCTCGTCCAGCA	c	hypothetical protein,putative integral membrane protein	SCO6333	<	1492	1146	<<	SCO6334	transcriptional regulator	1513	1519	<	SCO6335	hypothetical protein
15.2494	2.32e-05	CGGTGCATGCCCATGCGGGC	c	putative ROK family regulatory protein	SCO1039	<	294	256	<<	SCO1040	putative DNA repair protein	375	451	>	SCO1041	hypothetical protein
15.2503	2.33e-05	CACCGCATGCCCACGCAGCG	i	putative transcriptional regulator	SCO6733	<	87						117	>	SCO6734	putative L-asparagine permease
12.4488	2.35e-05	TCCGGCAAGATCATGCGGCG	c	putative integral membrane protein	SCO3562	>	2083	1821	>>	SCO3563	acsA acetyl-coenzyme A synthetase	115	299	>	SCO3564	putative sodium/proton antiporter
12.4634	2.43e-05	CGCTGCTTGACCGTGCGGTA	c	hpothetical protein	SCO0956	>	1368	1309	<<	SCO0957	putative oxidoreductase	174	278	<	SCO0958	hypothetical protein
11.0408	2.49e-05	GACCGCAACCGCTTGCAGAA	i	aml secreted alpha-amylase.	SCO7019	<	269						93	>	SCO7020	amlB secreted alpha-amylase.
13.748	2.53e-05	CGCCGCATGATCGTGCTGCC	c	putative efflux protein	SCO6751	<	1483	1005	>>	SCO6752	putative integral membrane transferase,putative transferase	793	790	>	SCO6753	putative nucleotide sugar-1-phosphate transferase
11.0241	2.53e-05	TACTGCACGACCTCGGAGAC	c	hypothetical protein	SCO6942	<	810	748	<<	SCO6943	putative sensor histidine-kinase.	750	778	<	SCO6944	hypothetical protein
10.9808	2.57e-05	CTGCGGAAGATCATCCAGGC	c	putative isomerase	SCO2627	<	1414	1199	>>	SCO2628	putative amino acid permease	50	80	>	SCO2629	hypothetical protein
10.9385	2.65e-05	GTCTCCGTGACCTTCCAGTC	c	putative integral membrane protein	SCO4129	<	168	109	<<	SCO4130	putative integral membrane protein	672	840	<	SCO4131	putative integral membrane protein
12.3341	2.67e-05	TGATGCGTGCCCTTGCGGTG	c	putative molybdenum cofactor biosynthesis protein	SCO3827	<	332	332	<<	SCO3828	putative molybdopterin-guanine dinucleotide biosynthesis protein	560	784	<	SCO3829	bkdC2, dihydrolipoamide acyltransferase component E2-like
10.9532	2.67e-05	TTCTGCATGCGCATGGGCGA	i	putative TetR-family transcriptional regulator	SCO7704	>	41						18	>	SCO7705	putative oxidoreductase
12.316	2.69e-05	CCACGCACACCCTTGCGGAA	i	hypothetical protein	SCO1754	<	281						44	<	SCO1755	hypothetical protein
10.8765	2.69e-05	GTCTGAATGGTCATGGCGGC	i	hypothetical protein	SCO2288	<	-13						148	>	SCO2289	putative membrane protein.
10.9291	2.71e-05	GTCCGGATGGACTCGCAGTA	c	putative hydroxylase	SCO7283	>	248	216	>>	SCO7284	rnhA putative ribonuclease H	472	575	>	SCO7285	putative hydroxylase
13.6208	2.73e-05	GACCGGATGGCCATGGAGCC	c	putative transferase	SCO2174	<	1022	918	>>	SCO2175	putativenicotinate-nucleotide-dimethylbenzimidazolephosphoribosyltransferase	136	559	<	SCO2176	putative integral membrane protein
10.8986	2.73e-05	GGCTCCATGCCTTTTCGGTC	c	putative ABC transport protein ATP-binding	SCO6814	<	1613	1607	<<	SCO6815	bi-domain ABC transporter permease protein.	185	189	<	SCO6816	putative ABC transporter binding lipoprotein.
10.8854	2.75e-05	GCACGCATGAGCTTCGAGAG	c	hypothetical protein	SCO3004	>	2944	2815	<<	SCO3005	secA preprotein translocase	9	291	>	SCO3006	putative acetyltransferase
10.9069	2.78e-05	TACTGCACGAGCACGCTGTC	c	fkbP peptidyl-prolyl cis-trans isomerase	SCO1638	<	307	247	<<	SCO1639	putative secreted peptidyl-prolyl cis-trans isomerase protein	741	923	<	SCO1640	hypothetical protein
12.2434	2.78e-05	GCCTGCACGGCCATGGAGAT	c	putative lipoprotein	SCO6221	>	885	874	<<	SCO6222	putative aminotransferase	315	403	>	SCO6223	hypothetical protein
12.206	2.82e-05	GACCCCATGGTCGTACAGGC	c	hypothetical protein	SCO0795	>	164	48	>>	SCO0796	putative integral membrane protein.	1192	1253	>	SCO0797	putative integral membrane protein.
12.2051	2.84e-05	GTCTGGACGATCTCGCAGGC	c	putative peptidase	SCO1074	>	594	460	<<	SCO1075	putative bifunctional protein (ATP/GTP binding protein/MutT-like)	564	733	<	SCO1076	putative secreted protein
12.1977	2.84e-05	GGCTGCACGGTCTTGGAAGC	c	idh isocitrate dehydrogenase.	SCO7000	<	623	520	<<	SCO7001	putative integral membrane protein.	522	695	<	SCO7002	probable amino acid/metabolite permease.
10.8491	2.86e-05	CACAGCATGAGCACGCACAC	i	putative quinone oxidoreductase	SCO3823	<	137						-13	>	SCO3824	putative ABC-transporter ATP-binding component
10.8016	2.89e-05	GTCTCCATGATCTCCCAGGC	c	putative secreted cellulase	SCO6545	<	1907	1660	<<	SCO6546	putative secreted cellulase	1242	1601	>	SCO6547	hypothetical protein
10.822	2.91e-05	TTCTCCATGGGCGTGCAGGT	c	hypothetical protein	SCO1693	<	1356	1276	<<	SCO1694	putative penicillin acylase	1386	1735	>	SCO1695	hypothetical protein
10.8025	2.91e-05	GCGTGCATGATTACCCGGTC	i	putative iron-sulphur-binding reductase	SCO3673	>	71						45	>	SCO3674	putative secreted kinase
14.9149	2.91e-05	CACCGCACGAGCGTGCAGCC	c	tetR family transcriptional regulatory protein-like	SCO4358	<	1030	933	>>	SCO4359	putative ABC transport system ATP-binding protein	58	55	>	SCO4360	putative ABC transport system integral membrane protein
10.7678	2.95e-05	CGCAGCATGATGTTGCGGTG	c	putative glycosyl transferase	SCO3794	<	1415	1330	<<	SCO3795	aspS aspartyl-tRNA synthetase	414	621	>	SCO3796	hypothetical protein
10.7897	2.98e-05	GTCAGCATGCACATGCTGGC	c	hypothetical protein	SCO5160	>	436	207	>>	SCO5161	hypothetical protein	631	685	>	SCO5162	putative integral membrane protein
13.4928	3e-05	CCCCGCAAGGTCGTGCACTC	c	putative secreted protein	SCO0431	<	3051	2754	>>	SCO0432	probable secreted peptidase	964	1082	>	SCO0433	putative transcriptional regulator
14.82	3.05e-05	CACCGCATCGCCATGCGGGC	c	hypothetical protein	SCO5125	<	602	450	>>	SCO5126	hypothetical protein	418	415	>	SCO5127	putative integral membrane protein
10.7182	3.07e-05	GACCCCAAGGGCATGGAGAA	c	acyl-CoA dehydrogenase FadE	SCO3051	<	1282	1089	>>	SCO3052	putative UDP-glucose 6-dehydrogenase	235	291	<	SCO3053	putative secreted esterase
10.6965	3.1e-05	GTCAGCATGTCCAGGCAGAC	c	hypothetical protein	SCO4894	<	782	778	<<	SCO4895	putative ECF sigma factor	207	315	<	SCO4896	putative transport integral membrane protein
10.6335	3.17e-05	GCCCGCCTGATGATGCAGAA	c	putative acetyl/propionyl CoA carboxylase, a subunit	SCO4381	>	941	870	>>	SCO4382	putative acyl CoA dehydrogenase	259	395	>	SCO4383	4-coumarate:CoA ligase
13.3976	3.17e-05	GTCCGCACGCTGATGCGGAG	c	putative integral membrane protein	SCO7613	<	430	346	<<	SCO7614	putative regulatory protein	156	255	>	SCO7615	putative DNA-binding protein
10.6764	3.19e-05	TGCTGGATGATCGAGCGGAC	c	putative oxidoreductase	SCO0229	>	498	498	>>	SCO0230	putative tetR-family transcriptional regulator	97	425	<	SCO0231	small hydrophobic hypothetical protein
10.6412	3.19e-05	GTGCCCATCGTCATGCAGTG	c	putative integral membrane transport protein	SCO1887	<	1242	1120	<<	SCO1888	putative dihydroxy-acid dehydratase	591	588	<	SCO1889	putative dihydropicolinate synthase
10.6412	3.19e-05	GTCTGCATCACCATGGGCTG	c	putative transcriptional regulator	SCO3699	<	326	234	>>	SCO3700	putative heavy metal reductase	160	157	>	SCO3701	hypothetical protein
12.0149	3.19e-05	GACTGCATGCCCAGGCACAC	c	putative integral membrane protein	SCO3850	<	376	379	<<	SCO3851	putative glutamine amidotransferase	240	237	<	SCO3852	hypothetical protein
10.6412	3.19e-05	CAGCCCATGGTGATGCAGAC	c	trxB2 putative thioredoxin reductase.	SCO6834	<	157	160	<<	SCO6835	arsC putative arsenate reductase.	234	327	>	SCO6836	arsR putative ArsR-family transcriptional regulator.
13.3887	3.24e-05	TCCTGGACGGCCTTGCGGAG	c	glpD glycerol-3-phosphate dehydrogenase (EC 1.1.99.5).	SCO0670	>	130	19	<<	SCO0671	hypothetical protein SCF91.31c.	216	232	>	SCO0672	putative anti-sigma factor antagonist.
12.015	3.24e-05	TCCTGCATCTCCGTGCAGCG	c	putative regulatory protein	SCO5678	>	999	855	>>	SCO5679	putative aldehyde dehydrogenase	571	581	<	SCO5680	putative cytidine deaminase
11.9368	3.32e-05	CTCTGCAAGCTCTTGCCGCC	i	malE putative maltose-binding protein	SCO2231	<	248						125	>	SCO2232	malR maltose operon transcriptional repressor
10.6174	3.34e-05	TTCTGGACGCGTATCCGGAC	c	putative tetR family transcriptional regulator	SCO0430	>	1061	1039	<<	SCO0431	putative secreted protein	270	567	>	SCO0432	probable secreted peptidase
11.9071	3.37e-05	GCCAGCATGATCATGCCGGC	c	hypothetical protein SCL2.11c	SCO1521	<	393	343	<<	SCO1522	putative glutamine amidotransferase involved in pyridoxine biosynthesis	246	259	<	SCO1523	pyridoxine biosynthesis protein
11.91	3.37e-05	CGCTGGAAGACCATGCCGAC	c	pitH PitH phosphate transport protein	SCO4138	>	619	499	<<	SCO4139	pstB phosphate ABC transport system ATP-binding protein	258	312	<	SCO4140	pstA phosphate ABC transport system permease protein
10.5844	3.4e-05	GCATGAATGTCCTTCCGGGC	i	polyketide synthase.	SCO6827	<	-3						678	>	SCO6828	putative secreted protein.
11.9224	3.42e-05	CGCTCGATGTCCATGCGGTC	c	putative long-chain fatty-acid CoA ligase.	SCO2561	<	1923	1681	<<	SCO2562	lepA GTP-binding protein.	168	406	>	SCO2563	rspT 30s ribosomal protein S20.
10.5251	3.53e-05	CTGTCCACGGCCATCCAGAA	c	putative two-component system sensor kinase	SCO5131	>	531	534	>>	SCO5132	putative two-component system response regulator	61	171	<	SCO5133	hypothetical protein
10.523	3.56e-05	CCATCCTTGGGCATGCAGTC	i	putative two-component response regulator	SCO5825	>	58						-7	>	SCO5826	undefined_product
10.4865	3.56e-05	CACCGCAACATCATGCGCGA	c	putative membrane protein	SCO5996	>	719	279	>>	SCO5997	putative secreted protein	220	856	<	SCO5998	putative UDP-N-acetylglucosamine transferase MurA2
10.5002	3.61e-05	TACTGCACGAACGTGCGGGT	c	putative sugar transporter inner membrane protein	SCO2432	<	133	136	<<	SCO2433	putative sugar transporter inner membrane protein	786	783	<	SCO2434	putative sugar transporter sugar binding protein
11.8576	3.61e-05	GGATGTACGGCCATGCGCAC	c	hypothetical protein SC9B2.15c	SCO6128	<	872	875	<<	SCO6129	putative DNA binding protein	17	100	>	SCO6130	hypothetical protein SC9B2.17
11.8525	3.64e-05	GACCGCAAGCGCAAGCAGTC	c	rplL 50S ribosomal protein L7/L12	SCO4653	>	1232	642	>>	SCO4654	rpoB DNA-directed RNA polymerase beta chain	2824	2922	>	SCO4655	rpoC DNA-directed RNA polymerase b chain
10.4497	3.72e-05	CTGTGCACGCGCATGGAAAG	i	putative polypeptide deformylase	SCO5221	>	75						165	>	SCO5222	putative lyase
11.7995	3.75e-05	GTTCGGACGGTCACGCAGTG	i	hisD histidinol dehydrogenase	SCO2054	<	118						63	>	SCO2055	hypothetical protein
10.421	3.78e-05	GGCCGCAAGACCAACCAGTA	c	hypothetical protein	SCO0388	>	395	372	>>	SCO0389	putative lipoprotein	1144	1146	>	SCO0390	putative membrane protein
10.3961	3.81e-05	GACTGCGTGACGATGCGCAA	c	hypothetical protein	SCO4489	<	988	900	>>	SCO4490	conserved hypothetical protein SCD69.10	538	535	>	SCO4491	putative octaprenyltransferase
10.3544	3.87e-05	GACGGCATGCTCGTCCAGTA	c	putative oxidoreductase	SCO0299	>	285	288	<<	SCO0300	putative monooxygenase	1504	1670	>	SCO0301	putative lipoprotein
11.699	3.96e-05	GACTCGATGGGCTTGCGGTC	c	putative membrane protein.	SCO2842	<	858	754	<<	SCO2843	conserved hypothetical protein	6	82	<	SCO2844	hypothetical protein .
10.3552	3.96e-05	TCTCGAATGAGCGTCCGGAC	c	putative integral membrane protein	SCO4334	>	96	64	<<	SCO4335	hypothetical protein SCD12A.18c	105	256	>	SCO4336	putative marR-family protein
10.3526	3.99e-05	CTCTGCATGGGCATCCTCGA	i	putative lipoprotein	SCO3107	<	141						-13	>	SCO3108	conserved hypothetical protein
10.3206	4.02e-05	GGATCGATGACCGTGCAAGG	i	putative lipoprotein	SCO4401	<	111						-13	>	SCO4402	hypothetical protein
13.0482	4.05e-05	GTCCGCATAGCCGTGCGCGA	c	putative DNA-binding protein	SCO1979	<	596	312	>>	SCO1980	hypothetical protein	382	379	>	SCO1981	hypothetical protein
11.6435	4.08e-05	GACCGGATGGTGATGCGTCC	c	conserved hypothetical protein	SCO1156	>	393	364	<<	SCO1157	putative ATP/GTP binding protein	231	300	<	SCO1158	hypothetical protein
10.3152	4.08e-05	ACCTGAATGCGCATCCAGCG	c	hypothetical protein	SCO3364	>	432	262	<<	SCO3365	putative DNA-binding protein	561	1149	<	SCO3366	putative exporter
10.3161	4.08e-05	CGCTGCGTGTACATCCGGAA	c	putative transmembrane protein	SCO3894	<	241	196	<<	SCO3895	hypothetical protein	2148	2374	>	SCO3896	tRNA nucleotidyltransferas
10.2755	4.11e-05	GTCCGCACCGTTGTTCAGTC	c	hypothetical protein	SCO2513	>	234	252	>>	SCO2514	hypothetical protein SCC121.17	19	48	>	SCO2515	putative lipoprotein
10.2841	4.11e-05	GCCTGGAAGATCAAGCGGCA	c	paaI putative phenylacetic acid degradation protein	SCO7470	<	837	672	>>	SCO7471	paaA putative phenylacetic acid degradation protein PaaA	295	292	>	SCO7472	paaB putative phenylacetic acid degradation protein PaaB
11.6406	4.14e-05	GCCTGGATGCCCTTGCGGAT	c	gyrA DNA gyrase subunit A	SCO3873	<	851	787	<<	SCO3874	gyrB DNA gyrase subunit B	1254	1689	<	SCO3875	hypothetical protein
10.2771	4.17e-05	TCCTGTGAAGGCATGCGGTC	i	hypothetical protein	SCO1688	>	-7						122	>	SCO1689	putative phosphotransferase
11.6216	4.17e-05	TCCTCCGCGATCATGCGGAC	c	putative secreted protein	SCO2496	>	924	904	<<	SCO2497	hypothetical protein SCC82.03c	297	406	>	SCO2498	putative efflux membrane protein,putative efflux protein
11.5811	4.17e-05	TCCTCCATGACCATGCCGGC	c	putative ABC-transporter transmembrane component	SCO3825	>	314	241	<<	SCO3826	putative membrane protein	837	834	<	SCO3827	putative molybdenum cofactor biosynthesis protein
10.2252	4.17e-05	TTCTGCATGACCTGGGAGGC	c	probable isobutyryl-CoA mutase, small subunit.	SCO6833	>	720	406	<<	SCO6834	trxB2 putative thioredoxin reductase.	555	552	<	SCO6835	arsC putative arsenate reductase.
11.5996	4.2e-05	GTCCGCACCCTCATGCACAC	c	hypothetical protein	SCO3935	>	1320	1023	>>	SCO3936	putative plasmid replication initiator protein	316	455	<	SCO3937	putative integrase /recombinase
11.6134	4.2e-05	GTACGGAAGGTTGTGCGGGC	c	putative integral membrane protein	SCO4579	<	1507	1200	<<	SCO4580	putative fumarylacetoacetase	37	522	>	SCO4581	conserved hypothetical protein
12.9755	4.27e-05	TCCTGCGTGTGCATGCGGGC	c	putative DNA repair hydrolase (fragment)	SCO2626	<	249	142	<<	SCO2627	putative isomerase	318	533	>	SCO2628	putative amino acid permease
11.5922	4.27e-05	CCTTCCGTGGCCTTGCAGAC	i	putative catalase	SCO6204	<	7						179	<	SCO6205	putative dehydrogenase
10.1342	4.3e-05	CTCTCCAGGAGCATGCGGAA	c	putative MarR-family transcriptional regulator	SCO4122	>	6447	601	<<	SCO4123	putative two-component response regulator	48	45	<	SCO4124	putative two-component sensor kinase
10.1979	4.3e-05	CCATGCCAGGTCATTCGGAG	i	nsdA Negative regulator of antibiotic production and morphological differentiation	SCO5582	>	56						235	>	SCO5583	amtB ammonium transporter
10.2338	4.3e-05	CATCGGACGCCCTTTCAGAG	c	hypothetical protein	SCO7190	>	948	744	<<	SCO7191	putative secreted protein	46	305	>	SCO7192	putative sigma factor
10.1551	4.33e-05	CTCGGCAACGTCATGCAGCA	c	hypothetical protein	SCO2403	>	426	330	>>	SCO2404	putative sugar-binding receptor	760	793	>	SCO2405	putative sugar-transport ATP binding protein
11.508	4.43e-05	TTCGGCATGAGCACGCGGAC	i	hypothetical protein	SCO1896	>	278						-13	>	SCO1897	putative transcriptional regulator
10.1555	4.47e-05	CCGTGGATGCTCATGGAGCA	c	putative transport integral membrane protein	SCO5688	>	897	897	>>	SCO5689	putative beta-galactosidase	1054	1051	>	SCO5690	hypothetical protein
10.1601	4.5e-05	CTCTGCTCGACCATCCGATG	c	putative integral membrane protein	SCO2807	>	384	277	>>	SCO2808	putative secreted protein	732	759	>	SCO2809	hypothetical protein
10.1758	4.5e-05	GGACGCATATGCACGCGTTG	i	rstP putative transcriptional regulator	SCO3943	<	39						361	>	SCO3944	hisC2 putative histidinol-phophate aminotransferase
10.126	4.5e-05	CCCTTGACGACCATGCAGAG	c	hypothetical protein	SCO4818	<	408	196	<<	SCO4819	putative secreted protein	255	354	<	SCO4820	pk28 putative eukaryotic-type protein kinase
10.1391	4.53e-05	TGCAGCACGATCTTCCAGCG	c	putative secreted protein.	SCO7450	>	1109	957	>>	SCO7451	hypothetical protein SC5C11.08	220	259	<	SCO7452	putative O-methyltransferase.
10.0876	4.67e-05	TTCTGCGCGCTGTTGCAGAC	c	putative prolyl aminopeptidase.	SCO0805	<	846	718	<<	SCO0806	putative LacI-family transcriptional regulatory protein.	288	378	<	SCO0807	conserved hypothetical protein
10.0901	4.71e-05	CACCGTATGAGCACGCACGA	i	putative AraC-family transcriptional regulator	SCO4206	<	44						-13	>	SCO4207	hypothetical protein
10.0617	4.78e-05	GCCTGCACTGCTTTGCGGTA	c	hypothetical protein	SCO3659	<	1357	1231	<<	SCO3660	hypothetical protein	393	563	<	SCO3661	clpB putative ATP-dependent protease ATP-binding subunit
11.4224	4.78e-05	CACAGCAAGACCGTGCGAGC	c	hypothetical protein	SCO6318	<	535	123	>>	SCO6319	putative lipoprotein	640	703	<	SCO6320	putative transport integral membrane protein
10.0535	4.81e-05	TGCTGGACGACTACGCGAAC	c	putative transmembrane efflux protein	SCO0680	<	1292	1150	>>	SCO0681	putative ferredoxin/ferredoxin-NADP reductase (EC 1.18.1.2)	195	289	<	SCO0682	hypothetical protein
11.3732	4.85e-05	TGCCGCACCATCTTGCGGTC	c	acdB acyl CoA dehydrogenase	SCO2774	<	350	220	<<	SCO2775	putative tetR-family regulatory protein	387	485	>	SCO2776	accD1 acetyl/propionyl CoA carboxylase, beta subunit
10.0233	4.89e-05	TGACCGATGGACATGCGGAG	i	hypothetical protein	SCO5036	<	-13						178	<	SCO5037	hypothetical protein
14.1	4.89e-05	GCCCCCACGGTCATGCAGCG	c	atpH ATP synthase delta chain	SCO5370	>	602	408	>>	SCO5371	atpA ATP synthase alpha chain	1162	1184	>	SCO5372	atpG ATP synthase gamma chain
11.3568	5.04e-05	TACCGCATGGACGTGCGCGA	i	hypothetical protein	SCO3689	<	-7						-13	>	SCO3690	putative hydrolase
14.0479	5.07e-05	CGCCGTACGGTCATGCGGCC	i	hypothetical protein	SCO1647	<	5						227	<	SCO1648	arcAA AAA ATPase
11.2588	5.26e-05	CCTTGGATGACCTTGCGCCC	c	putative LacI-family regulatory protein	SCO4158	<	48	5	<<	SCO4159	glnR transcriptional regulatory protein	779	1022	>	SCO4160	putative hydrolase
11.2811	5.26e-05	GACTGCACAAACGCGCAGGG	i	putative transferase	SCO5365	>	41						203	>	SCO5366	atpI ATP synthase protein I
12.6066	5.38e-05	TCCTGGACGCCCTTGCGGAC	c	dldh putative D-lactate dehydrogenase	SCO2118	<	1027	943	<<	SCO2119	pfkA 6-phosphofructokinase	66	118	<	SCO2120	putative two-component system regulator
11.1586	5.5e-05	GGCCGCACGATCATGAGGAC	c	hypothetical protein	SCO0695	>	362	22	<<	SCO0696	putative integral membrane protein.	453	708	>	SCO0697	putative AraC-family regulator (pseudogene).
11.1932	5.5e-05	CGACGGATGACCATGGGGGA	i	putative kinase	SCO2662	>	127						84	>	SCO2663	putative secreted protein
12.5781	5.5e-05	CCCTGCGCGACCATGCGACA	c	conserved hypothetical protein	SCO2680	>	2127	2128	>>	SCO2681	putative ATP /GTP-binding protein	192	257	<	SCO2682	putative membrane protein
11.2187	5.5e-05	GATCGCGTGGACGTGCAGGA	c	hypothetical protein	SCO7658	>	1005	1044	<<	SCO7659	putative oxidoreductase	58	385	>	SCO7660	kcsA voltage-gated potassium channel
11.1946	5.54e-05	CACCGCATGGAAGTGCAGGG	c	putative excisionase,putative excisionase	SCO3251	<	702	705	<<	SCO3252	repSA replication initiator protein	676	766	<	SCO3253	SpdD SpdD protein
11.1857	5.63e-05	TGACGCATGGACTCGCAGCG	c	putative integral membrane protein	SCO3870	<	714	149	>>	SCO3871	putative decarboxylase	242	818	<	SCO3872	putative integral membrane protein
12.5262	5.63e-05	ACCCGCAAGGTCGTGCAGCG	c	hypothetical protein	SCO7439	>	906	864	<<	SCO7440	putative hydrolase.	61	148	>	SCO7441	putative transcriptional regulatory protein.
13.8488	5.8e-05	CGCCGGATGCTCGTGCAGCG	c	hypothetical protein	SCO3329	<	882	588	<<	SCO3330	hypothetical protein	496	516	<	SCO3331	putative transmembrane transport protein
12.4504	5.88e-05	GACTGCGTGGTCGTGGAGGC	c	putative secreted hydrolase ,putative secreted protein	SCO4860	>	335	216	>>	SCO4861	hypothetical protein SCK20.02	310	398	>	SCO4862	hypothetical protein
11.059	5.93e-05	CGGCGGAAGATCTTGCGGAC	c	putative carbohydrate kinase.	SCO2540	<	1404	1324	<<	SCO2541	probable transmembrane transport protein.	27	92	<	SCO2542	putative dehydratase.
11.0838	5.93e-05	TCCTCCATGGCCACCCAGTC	c	hypothetical protein	SCO6843	<	856	856	<<	SCO6844	putative DNA methylase.	396	393	<	SCO6845	hypothetical protein
12.4193	6.01e-05	CGCCGCACGACCTTGCGGAT	c	hypothetical protein	SCO6045	<	616	472	<<	SCO6046	hypothetical protein	258	303	>	SCO6047	ABC-transporter ATP-binding protein
13.7446	6.1e-05	GCCCGCAAGGCGATGCAGCG	c	dapB putative dihydrodipicolinate reductase	SCO5739	>	407	393	>>	SCO5740	putative membrane protein	43	119	<	SCO5741	putative membrane protein
11.0114	6.15e-05	GCCCGCAAGGTCACGGAAAG	i	fmt methionyl-tRNA formyltransferase	SCO1473	<	56						234	>	SCO1474	hypothetical protein
12.4068	6.15e-05	GGCTGCATGGCCGAGCGGTA	c	hypothetical protein	SCO5751	>	338	246	>>	SCO5752	hypothetical protein SC7C7.07	1216	1213	>	SCO5753	pgsA phosphatidylglycerophosphate synthase
12.3784	6.19e-05	CGCCGCATCCCCGTGCAGTA	c	rplO 50S ribosomal protein L15	SCO4721	>	986	729	>>	SCO4722	secY preprotein translocase SecY subunit	565	565	>	SCO4723	adk adenylate kinase (fragment),adenylate kinase
10.9548	6.24e-05	GTCGGCAAGACCATGCTGGC	c	hypothetical protein	SCO2093	>	458	141	>>	SCO2094	MoxR AAA+ ATPase, MoxR proper subfamily, possible chaperone	853	850	>	SCO2095	DUF58 protein
10.9767	6.24e-05	TCCTGCATCGCCTTGGAGGC	c	trxA thioredoxin	SCO3889	<	442	403	<<	SCO3890	trxB thioredoxin reductase (NADPH)	546	706	<	SCO3891	putative membrane protein
10.981	6.33e-05	GAGCGCATGACCACCCAGGA	c	rplL 50S ribosomal protein L7/L12	SCO4653	>	1751	1161	>>	SCO4654	rpoB DNA-directed RNA polymerase beta chain	2305	2403	>	SCO4655	rpoC DNA-directed RNA polymerase beta' chain
10.9748	6.42e-05	CCATGCACGGTCAAGCGTGC	i	putative tetR-family regulatory protein	SCO6323	<	154						213	>	SCO6324	putative hydrolase
10.8671	6.61e-05	GTCCGCACGCTCATACCGAG	c	SCC61A.06c	SCO2685	<	619	145	<<	SCO2686	putative luxR-family transcriptional regulator	852	1161	>	SCO2687	ribA1 GTP cyclohydrolase II
10.9077	6.61e-05	GCTTGGGAGAGCATGCGGAG	c	hypothetical protein	SCO4631	<	3599	2437	>>	SCO4632	putative ATP/GTP binding protein	444	741	<	SCO4633	hypothetical protein
10.9031	6.66e-05	TGCAGCATGGTCTCGCGGTC	c	gluC glutamate permease	SCO5775	<	635	550	<<	SCO5776	gluB glutamate periplasmic binding protein	267	393	<	SCO5777	gluA glutamate uptake system ATP-binding protein
12.2702	6.66e-05	GCCCGCACGCTCTCGCAGAA	c	putative solute-binding transport protein	SCO6088	>	332	21	>>	SCO6089	putative antibiotic resistance rRNA adenine methyltransferase	742	739	>	SCO6090	putative antibiotic resistance macrolide glycosyltransferase
12.2375	6.71e-05	TCCCGCATCGGTATGCGGCC	c	hypothetical protein	SCO0214	>	430	349	<<	SCO0215	hypothetical protein SCJ12.27c	639	1231	>	SCO0216	narG2 nitrate reductase alpha chain
16.3195	6.81e-05	GCCCGCACGGCCATGCGGCG	c	hypothetical protein	SCO2453	>	1289	1080	>>	SCO2454	putative integral membrane protein	1132	1244	<	SCO2455	putative spermidine synthase
10.84	6.86e-05	TCCTCCGTGGTCATCCGGAC	c	putative excinuclease ABC subunit A	SCO0918	>	167	124	<<	SCO0919	hypothetical protein SCM10.07c	816	889	<	SCO0920	putative acyltransferase
12.1813	6.91e-05	GTGCCCATGACCGTGCGGAC	c	ruvA holliday junction DNA helicase	SCO1519	<	319	322	<<	SCO1520	ruvC crossover junction endodeoxyribonuclease	225	334	<	SCO1521	hypothetical protein
10.8036	6.91e-05	GACTGCCAGGTCATGCACCG	c	putative non-ribosomal peptide synthase	SCO7682	>	1365	1368	>>	SCO7683	putative non-ribosomal peptide synthase	4141	4138	>	SCO7684	conserved hypothetical protein
10.8019	6.96e-05	GGCTGCACCGTCATGGAGGA	c	hypothetical protein	SCO7813	>	1763	289	<<	SCO7814	putative oxidoreductase (pseudogene).	612	626	>	SCO7815	putative TetR-family transcriptional regulator.
14.9138	7.01e-05	GGCTGCACGGCCACGCGGAC	c	putative TetR-family transcriptional regulator.	SCO0887	<	666	526	>>	SCO0888	putative secreted protein.	18	79	<	SCO0889	putative LysR-family transcriptional regulatory protein.
10.7978	7.01e-05	CGCTGGACGGTCATCGAGAC	c	putative RNA polymerase sigma factor	SCO4005	>	1698	1569	>>	SCO4006	putative fatty acid CoA ligase	88	161	<	SCO4007	putative integral membrane protein
10.8153	7.06e-05	CCTCGCATGCCTGTCCGTAC	i	small hypothetical protein	SCO6744	>	59						26	<	SCO6745	hypothetical alanine-rich protein
10.7734	7.11e-05	GGATGCATGCCCATGAGGCC	c	hypothetical protein	SCO3379	<	1080	646	<<	SCO3380	putative transcriptional regulators, homologs of Bvg accessory factor	132	138	<	SCO3381	nadC nicotinate-nucleotide pyrophophorylase
10.7845	7.11e-05	TACTGGACGAGCATGGGGGC	c	putative two component system response regulator	SCO4363	>	372	312	>>	SCO4364	hypothetical protein SCD19.19	46	82	>	SCO4365	hypothetical protein SCD19.20
10.7728	7.11e-05	GAGCGCAAGGTCGTGGAGTC	c	atpA ATP synthase alpha chain	SCO5371	>	412	390	>>	SCO5372	atpG ATP synthase gamma chain	508	508	>	SCO5373	atpD ATP synthase beta chain
12.1119	7.16e-05	CGCTCCATGACGATGCGGCG	c	putative ABC-transporter integral membrane protein	SCO2421	<	637	640	<<	SCO2422	putative ABC-transporter ATP-binding protein	372	1005	>	SCO2423	putative secreted protein
12.1254	7.22e-05	GGCTGCATGGGCATGGTGGC	i	putative membrane protein	SCO3145	<	-13						415	<	SCO3146	putative membrane protein
10.7129	7.27e-05	GGCGGCACGATCATCCAGGA	c	undefined_product	SCO5500	>	811	795	>>	SCO5501	gatB probable Glu-tRNAGln amidotransferase subunit B	700	942	>	SCO5502	putative integral membrane export protein
10.6537	7.32e-05	GGCCGCAAGGTCCTTCAGAC	c	putative SecG-like integral membrane protein	SCO1944	<	365	291	<<	SCO1945	tpi triose phosphate isomerase	466	472	<	SCO1946	pgk phosphoglycerate kinase
10.7331	7.37e-05	GTCCGCGTGGACATCCACAC	c	rplV 50S ribosomal protein L22	SCO4707	>	186	186	>>	SCO4708	rpsC 30S ribosomal protein S3	628	634	>	SCO4709	rplP 50S ribosomal protein L16
10.7192	7.48e-05	GTCTGCGCGTTCATGCTGGG	c	probable secreted solute-binding lipoprotein.	SCO0453	>	419	318	>>	SCO0454	binding-protein dependent transport protein	604	619	>	SCO0455	putative binding-protein dependent transport protein
12.0446	7.65e-05	GTCCGCGTAGACGTGCGGTC	c	putative transmembrane protein	SCO3940	<	260	78	<<	SCO3941	putative serine /threonine phosphatase	1009	1207	>	SCO3942	hypothetical protein
13.4074	7.65e-05	CGCTGGACGGTCGTGCGGTG	c	hypothetical protein	SCO4249	>	1367	1357	>>	SCO4250	hypothetical protein SCD8A.23	1959	2003	<	SCO4251	putative secreted protein
13.4074	7.65e-05	CGCTGGACGGTCGTGCGGTG	c	hypothetical protein	SCO4249	>	1781	1771	>>	SCO4250	hypothetical protein SCD8A.23	1545	1589	<	SCO4251	putative secreted protein
13.3935	7.65e-05	GTCTGCACCGGCATGCGGGG	c	putative ATP-dependent DNA helicase	SCO5184	>	614	603	>>	SCO5185	putative peptidase	790	940	>	SCO5186	conserved hypothetical protein
10.6529	7.7e-05	CGCCCCAAGATCACGCATGG	i	putative integral membrane protein	SCO2395	<	-17						94	<	SCO2396	hypothetical protein
10.6134	7.87e-05	TTCTCGAAGGCCTTGCGGGC	c	putative aldehyde dehydrogenase	SCO4912	<	1224	1213	<<	SCO4913	putative aldehyde dehydrogenase	210	216	<	SCO4914	putative deoxyribose-phosphate aldolase
10.6373	7.93e-05	TCCAGCATGGCCTCGCGGAA	c	putative hydrolase	SCO1656	<	2527	2401	<<	SCO1657	putative methionine synthase	1092	1496	>	SCO1658	gylR glycerol operon regulatory protein
10.5812	7.93e-05	TTGCGCATGACCGTGCCGTC	c	hypothetical protein	SCO2919	<	403	256	<<	SCO2920	putative secreted protease	2070	2504	>	SCO2921	hypothetical protein
11.9306	8.21e-05	GTGTGCGTGAGCGTGCGGTG	c	L31 50S ribosomal protein L31	SCO1150	>	517	496	<<	SCO1151	putative integral membrane protein	279	374	>	SCO1152	putative helicase
10.5564	8.21e-05	CCCCGGAAGTCCATGCTGAC	c	hypothetical protein	SCO6067	<	204	202	<<	SCO6068	hypothetical protein	198	195	<	SCO6069	putative large secreted protein
10.5531	8.21e-05	CACCGGATTGTCGTGCGGAG	c	putative protein associated with oxidoreductase	SCO6558	<	96	63	<<	SCO6559	putative respiratory chain oxidoreductase	778	775	<	SCO6560	putative respiratory chain oxidoreductase
10.5292	8.27e-05	TTCCGCATGAGCTTCGGGCC	i	transcriptional regulator	SCO5847	>	148						46	>	SCO5848	agaZ tagatose 6-phosphate kinase
10.515	8.39e-05	GACAGCATGGCCATCGGGTG	c	putative integral membrane protein.	SCO2735	>	1526	883	<<	SCO2736	citA citrate synthase.	387	625	<	SCO2737	helicase, RecD/TraA family
11.892	8.45e-05	TGCTGCACGACTGCGCGGAG	c	hypothetical protein	SCO0715	<	782	487	>>	SCO0716	putative glycosyl hydrolase.	696	768	>	SCO0717	putative integral membrane protein.
11.8782	8.45e-05	CGCCGGAAGCTCGTGCGGAA	i	hypothetical protein	SCO0955	<	111						346	>	SCO0956	hpothetical protein
11.8735	8.45e-05	CGCTGCACGGCCATGGTGAC	c	putative ATP-binding protein	SCO4617	<	198	196	<<	SCO4618	hypothetical protein SCD39.18c	636	726	<	SCO4619	putative integral membrane protein
11.8444	8.57e-05	GTCCGCATGGCCACCGAGAG	c	putative transferase	SCO2998	>	249	31	<<	SCO2999	putative NAD-glutamate dehydrogenase similar to GDH of S: clavuligerus	4911	5414	<	SCO3000	putative phosphatase
10.4965	8.57e-05	GTCAGCGTGACCATGCTGCG	c	putative regulatory protein	SCO6696	>	223	196	<<	SCO6697	pcaL putative 3-oxoadipate enol-lactone hydrolase/4-carboxymuconolactone decarboxylase	912	909	<	SCO6698	pcaB putative 3-carboxy-cis,cis-muconate cycloisomerase
10.4561	8.64e-05	CTGTGCCTGGTCGTGCAGGA	c	gvpJ putative gas vesicle synthesis protein.	SCO0655	>	141	144	>>	SCO0656	gvpL putative gas vesicle synthesis protein.	679	715	>	SCO0657	gvpS putative gas vesicle synthesis protein.
10.4264	8.82e-05	CTCCGCGAGATCATCCGCAC	c	rpoB DNA-directed RNA polymerase beta chain	SCO4654	>	926	828	>>	SCO4655	rpoC DNA-directed RNA polymerase beta' chain (fragment)	3052	3162	>	SCO4656	putative integral membrane protein
10.4156	8.89e-05	CTCAGCGTCACCATGCGGAC	i	hypothetical protein	SCO5772	<	205						71	<	SCO5773	possible monooxygenase
11.7676	8.95e-05	CCCTCGATGGACATGCGGGC	c	hypothetical protein	SCO2993	>	515	467	<<	SCO2994	putative tetR-family transcriptional regulator (fragment)	204	311	>	SCO2995	putative ABC transporter integral membrane protein
10.418	8.95e-05	GAGCGCAAGGTCGTGCACGA	c	putative membrane protein	SCO3883	>	430	414	>>	SCO3884	hypothetical protein	79	204	>	SCO3885	rsmG 16S rRNA Methyltransferase
10.3996	8.95e-05	GTTCGCGCCATCATGCAGCG	i	ddah dimethylarginine dimethylaminohydrolase	SCO6718	<	72						26	<	SCO6719	UvrA-like ABC transporter
11.7766	9.01e-05	GCCTGAACGGTCGTGCACCG	i	putative TetR-family transcriptional regulator.	SCO6792	>	-5						10	<	SCO6793	probable aldehyde dehydrogenase.
11.7707	9.01e-05	CGCAGCAAGGTCACGCGGAC	i	putative secreted oxidoreductase	SCO7791a	<	238						33	<	SCO7792	hypothetical protein
10.3645	9.08e-05	GCCCGGATGATCGTCGAGAC	c	putative gntR-family regulatory protein	SCO1289	>	346	201	>>	SCO1290	putative secreted phosphatase (fragment),putative secreted alkaline phosphatase (fragment)	1369	1520	>	SCO1291	hypothetical protein
10.3513	9.08e-05	TACGGCATGCCGATGCAGCC	c	putative integral membrane protein	SCO5663	>	227	168	>>	SCO5664	putative integral membrane protein	262	324	<	SCO5665	hypothetical protein
11.758	9.14e-05	GTACGTGTGGCCGTGCAGGC	c	putative ATP/GTP binding protein	SCO5061	>	245	123	<<	SCO5062	hypothetical protein	250	250	<	SCO5063	hypothetical protein
13.1048	9.14e-05	CCCCGCATGGTTGTGCGCGC	c	hypothetical protein	SCO6372	>	967	663	<<	SCO6373	putative integral membrane protein	715	840	<	SCO6374	putative sugar transferase
10.3943	9.21e-05	TGCCGCTTGCCCTTGCGTAG	i	putative ABC transport system ATP binding protein	SCO3755	<	23						167	<	SCO3756	putative TCS response regulator
13.0974	9.27e-05	TGCCGCATGCGCATGCGCCC	i	conserved protein, possible protein phosphatase	SCO0451	<	200						-13	>	SCO0452	putative SIR2-like regulatory protein
10.3593	9.34e-05	GTGCGCATACCCGTGCACGA	c	putative AMP-binding ligase	SCO7681	<	3881	3720	>>	SCO7682	putative non-ribosomal peptide synthase	2950	2947	>	SCO7683	putative non-ribosomal peptide synthase
10.2952	9.47e-05	GTCGGCAAGTCCGTGCAGCA	c	putative integral membrane transport protein	SCO1929	>	598	591	>>	SCO1930	putative integral membrane transport protein	460	415	<	SCO1931	hypothetical protein
10.341	9.47e-05	CGTCGCACAGGCAAGCAGAC	i	hypothetical protein	SCO5288	<	483						8	>	SCO5289	cvnA5 hypothetical protein (fragment),possible sensor kinase
10.2387	9.47e-05	GGTCGCAGAACCGTGCAGAC	c	putative trehalose synthase	SCO5442	<	34	37	<<	SCO5443	pep1A putative alpha-amylase	1971	2336	>	SCO5444	glgP putative glycogen phosphorylase
10.3051	9.47e-05	TACGGCGTGTCCATGCAGGG	c	acy putative acylphosphatase	SCO5576	>	4398	3495	>>	SCO5577	putative chromosome associated protein	46	234	>	SCO5578	putative sugar transporter
10.3049	9.54e-05	GGCCGAATCCGTATGCGGTG	c	hypothetical protein	SCO4255	>	329	238	>>	SCO4256	putative hydrolytic protein	1182	1258	>	SCO4257	putative hydrolytic protein
10.3049	9.54e-05	GGCCGAATCCGTATGCGGTG	c	putative hydrolytic protein	SCO4256	>	314	238	>>	SCO4257	putative hydrolytic protein	1185	1284	>	SCO4258	putative hydrolytic protein
10.3049	9.54e-05	GGCCGAATCCGTATGCGGTG	c	putative hydrolytic protein	SCO4257	>	337	238	>>	SCO4258	putative hydrolytic protein	1200	1225	<	SCO4259	putative AAA family ATPase
11.6659	9.54e-05	GGCTGGATGCTCGTGGAGGG	c	hypothetical protein	SCO5241	<	254	126	>>	SCO5242	putative integral membrane protein	313	333	<	SCO5243	sigH RNA polymerase sigma factor
10.3108	9.61e-05	GTGCGCAAGCTCGCGCAGAA	c	putative lipoprotein	SCO4095	>	520	216	>>	SCO4096	ATP-dependent RNA helicase	1987	2126	>	SCO4097	amino acid/metabolite permease-like, integral membrane protein
10.2641	9.67e-05	GCCCGCATGCTCAGGCACTA	c	hypothetical protein	SCO0406	>	43	39	>>	SCO0407	putative transcriptional regulator	946	947	>	SCO0408	probable methyltransferase
10.2847	9.67e-05	TCCCGCAAGCTGGTGCAGCA	c	hypothetical protein	SCO5742	<	546	354	>>	SCO5743	thyX thymidylate synthase [EC:2.1.1.148]	367	587	>	SCO5744	dapA putative dihydrodipicolinate synthase
10.296	9.67e-05	TCCCGGGTGACCATCCGGAA	c	putative glucosidase	SCO6670	>	633	640	<<	SCO6671	hypothetical protein SC5A7.21c	507	790	>	SCO6672	hypothetical protein
10.2891	9.74e-05	CTCTGTAAGGGCGTGCTGCG	i	accA2 putative acyl-CoA carboxylase complex A subunit	SCO4921	<	189						167	>	SCO4922	putative integral membrane protein
10.2535	9.74e-05	GCCTGCATCACCTCCCAGAC	c	hypothetical protein	SCO5164	>	481	373	<<	SCO5165	putative hydrolase	504	615	<	SCO5166	putative helicase
10.2771	9.74e-05	CCCTGGAAGGGCATCCACTC	c	hypothetical protein	SCO5619	>	1876	1806	>>	SCO5620	hypothetical protein SC2E1.37	565	848	>	SCO5621	whiG RNA polymerase sigma factor WhiG
11.6634	9.74e-05	GACCGCACGCCCAAGCAGGA	c	putative secreted protein.	SCO6934	<	348	273	<<	SCO6935	hypothetical protein SC1G8.07c.	283	280	<	SCO6936	undefined_product
11.6233	9.81e-05	GCCCGCATCCGCATTCAGCG	c	hypothetical protein	SCO0326	>	532	512	>>	SCO0328	insertion element IS1650 transposase	322	383	>	SCO0329	putative esterase
11.634	9.81e-05	CACCGCATGACCGTCCTGCG	i	putative dehydrogenase	SCO5050	>	-9						-13	>	SCO5051	putative glycosyltransferase
11.6233	9.81e-05	GCCCGCATCCGCATTCAGCG	c	hypothetical protein	SCO5296	<	821	512	>>	SCO5297	putative transposase	322	338	<	SCO5299	putative membrane protein
11.6233	9.81e-05	CGCTGAATGCGGATGCGGGC	c	hypothetical protein	SCO7756	>	949	322	<<	SCO7757	putative transposase	512	601	>	SCO7759	putative DNA-binding protein
10.2282	9.88e-05	GTGCGCAACGCCATCCAGAC	c	putative protein kinase (regulator)	SCO2450	>	947	777	>>	SCO2451	putative rod shape-determining protein	286	322	>	SCO2452	putative two-component sensor histidine kinase
11.6152	9.88e-05	CGCTGCACCGTCGTGCGTAG	i	putative lipoprotein	SCO6381	<	1338						194	>	SCO6382	putative secreted protein
10.1857	9.95e-05	CTCTGCGTGGCCCTGCGTAA	i	hypothetical protein	SCO4346	<	221						5	<	SCO4347	hypothetical protein
Table S4B. Predicted Arg boxes with Ri values lower than 10, associated to some of the differentially expressed genes
9.73981	0.00119	CCGCGCTCGGCCATGCGGTG	c	pyrA; carbamoylphosphate synthetase L chain	SCO1483	<	513	520	<<	SCO1484	pyrAa; carbamoyl-phosphate synthase, pyrimidine-specific, small chain	603	600
9.29929	3.19e-05	CTCCGTAAGGCGATTCATGC	i	pyrB; aspartate carbamoyltransferase	SCO1487	<	9						87
7.39966	6.99e-06	TGTTGCTTGTCCATACGAAA	i	pyrR; pyrimidine operon regulatory protein	SCO1488	<	-13						292
9.0768	1.47e-05	GAGAGCATGACTATACGTGC	i	argC; N-acetyl-gamma-glutamyl-P reductase	SCO1580	<	18						-3
5.50112	0.00231	CACGGCACGCCCATGCCGTT	c	putative acetyltransferase	SCO1864	>	634	504	>>	SCO1865	aminotransferase, putative	748	867
4.92573	0.000832	GGTCTGATGATCATGCCGGG	c	putative condensing enzyme	SCO1866	>	553	489	>>	SCO1867	hydroxylase, putative	334	416
9.40273	3.02e-05	GGAACCAAGCCCATGCAGTA	i	whiB; sporulation regulatory protein	SCO3034	<	140						526
5.78906	0.00204	CACTGGCTGGTGATGCGCCC	c	glnR; transcriptional regulatory protein	SCO4159	<	765	522	>>	SCO4160	hydrolase, putative	295	332
6.94897	0.000299	CTTCGACAGCTCGTGCAGGA	c	putative oxidoreductase	SCO4594	<	1016	1023	<<	SCO4595	oxidoreductase, putative	895	1230
3.67031	0.00279	GAGGGCATCGTCATGCCACG	c	ORF3hypothetical protein	SCO5074	>	766	732	>>	SCO5075	oxidoreductase, putative	169	166
8.12728	0.000333	TACCCGATGGGTATGCGCGG	c	actVA4; conserved hypothetical protein	SCO5079	>	531	534	>>	SCO5080	actVA5putative hydrolase	592	585
4.33931	0.0059	CAGGACATGACCATGGAGAC	c	actIORF3; actinorhodin polyketide synthase acyl carrier protein	SCO5089	>	624	627	>>	SCO5090	actVII; actinorhodin polyketide synthase bifunctional cyclase/dehydratase	304	301
6.60989	0.000357	GTCAGCATCACCTTCCGCTC	c	whiE ORF I; whiE protein I	SCO5320	<	980	636	>>	SCO5321	whiE ORF VIII; polyketide hydroxylase	1228	1305
8.89445	9.81e-05	GCCTCGTTGGTCATGCATCC	i	hypothetical protein	SCO5326	<	146						-7
8.08655	0.000159	TTGCCCATGCCCTTGCTGAG	c	nrdJ; ribonucleotide reductase	SCO5805	>	583	505	<<	SCO5806	hypothetical protein	84	107
11.2472	0.00108	GGCGGCAAGGCCGTGCGGGC	c	redV; RedV protein	SCO5882	<	746	633	<<	SCO5883	redU; hypothetical protein	133	201
6.32557	0.00156	GACGGCGTGGGCCTGCAGAA	c	redI, methyltransferase-like	SCO5895	>	1673	1650	>>	SCO5896	redH; phosphoenolpyruvate-utilizing enzyme	1132	1210
6.90818	0.00107	GGTCATATAGCCATGCGAAC	i	Possible red gene. Hypothetical	SCO5899	>	227						123
8.70477	0.000994	GAGGGCATAGGCGTGCGGGG	c	whiI; two-component regulator	SCO6029	<	762	468	<<	SCO6030	hypothetical protein	229	381
8.81941	0.000229	GTCAGCGAAGGCATGCGAGG	i	putative deacetylase	SCO6178	<	29						124
7.23925	0.00106	CGCCCCATGCGCATCCTTGG	i	putative nucleotide-sugar dehydratase	SCO6179	>	115						-13
7.74421	0.000405	TCCGGCATGGCCTCGCAGAT	c	putative transferase	SCO6184	>	327	330	>>	SCO6185	putative transferase	871	868
5.60196	0.0022	CCCAGCCAGGTCATGCCGTG	i	orfBputative histidine kinase	SCO6268	<	8						99
6.94897	0.000299	CTTCGACAGCTCGTGCAGGA	c	cpkP; oxidoreductase beta-subunit	SCO6269	<	1016	1023	<<	SCO6270	cpkP; oxidoreductase-like a -subunit	850	854
6.54505	7.7e-05	CAGCTCAAGACCATGCACAA	c	accA1; acyl-CoA carboxylase alfa subunit	SCO6271	<	1260	951	>>	SCO6272	scFputative secreted FAD-binding protein	682	758
5.10705	0.000378	CTCTTCCAGACCTTGCAAGC	i	cpkA; type I polyketide synthase	SCO6275	<	74						233
7.31352	0.000234	GCGCGGAAGATCCTGCAGAA	c	cpkG; aminotransferase	SCO6279	>	481	174	>>	SCO6280	cpkO; SARP regulator	1438	1702
4.01944	0.000678	TTCCTCATGGAGGTGCACAG	i	cpkO; SARP regulator	SCO6280	>	242						3
8.38349	0.000288	TGCTGGAACGGCATCCGGAC	c	tkt2; transketolase	SCO6497	>	211	214	>>	SCO6498	hypothetical protein	726	792
5.21509	0.000353	CTCGTCATAGTGATGCAGCG	c	putative secreted hydrolase	SCO7697	>	1132	1038	<<	SCO7698	merR-family transcriptional regulator	85	333
9.2382	0.000767	GCCCGCCCGGACATGCAACG	c	eshA; modulator of ppGpp, cAMP-binding protein	SCO7699	>	1058	975	>>	SCO7700	cyclase-like,hypothetical protein	328	344
